# Supplementary material for: Changes in Content of Polyphenols and Ascorbic Acid in Leaves of White Cabbage after Pest Infestation
Source: PubMed Central journal article supplement (PMC6680958; doi:10.3390/molecules24142622), 2019-07-18
Supplement: molecules-24-02622-s001.pdf [file molecules-24-02622-s001.pdf]

# Changes of polyphenols and ascorbic acid content in leaves of white cabbage after pest infestation

Zuzana Kovalikova <sup>1\*</sup>, Jan Kubes <sup>2</sup>, Milan Skalicky <sup>2\*</sup>, Nikola Kuchtickova <sup>1</sup>, Lucie Maskova <sup>1</sup>, Jiri Tuma <sup>1</sup>, Pavla Vachova <sup>2</sup> and Vaclav Hejnak <sup>2</sup>

<sup>1</sup> Department of Biology, Faculty of Science, University of Hradec Kralove, Rokitanskeho 62, 500 03, Hradec Kralove, Czech Republic; zuzana.kovalikova@uhk.cz (Z.K.); nikola.kuchtickova@seznam.cz (N.K.); lucina.maskova@seznam.cz (L.M.); jiri.tuma@uhk.cz (J.T.)

<sup>2</sup> Department of Botany and Plant Physiology, Faculty of Agrobiolgy, Food and Natural Resources, Czech University of Life Sciences Prague, Prague, Czech Republic; kubes@af.czu.cz (J.K.); skalicky@af.czu.cz (M.S.); hejnak@af.czu.cz (V.H.); vachovap@af.czu.cz (P.V.)

\* Correspondence: skalicky@af.czu.cz; zuzana.kovalikova@uhk.cz; Tel.: +420-224-382-520

**Table S1.** The content of observed stress compound, primary and secondary metabolites in control sample of white cabbage extract.

| Compound | Superoxide<br>[ $\mu\text{g}\cdot\text{g}^{-1}$ FW] | Total soluble<br>proteins<br>[ $\text{mg}\cdot\text{g}^{-1}$ FW] | Phenylalanine<br>[ $\text{nmol}\cdot\text{g}^{-1}$ FW] | Tyrosine<br>[ $\text{nmol}\cdot\text{g}^{-1}$ FW] | Total phenoles<br>content<br>[ $\text{mg}\cdot\text{g}^{-1}$ FW] | Total flavonoid<br>content<br>[ $\text{mg}\cdot\text{g}^{-1}$ FW] |
|----------|-----------------------------------------------------|------------------------------------------------------------------|--------------------------------------------------------|---------------------------------------------------|------------------------------------------------------------------|-------------------------------------------------------------------|
|          | 9.778 $\pm$ 0.325                                   | 18.778 1.859                                                     | 112.440 8.504                                          | 110.717 1.354                                     | 3.573 0.115                                                      | 2.754 0.125                                                       |

Data are mean  $\pm$  SE of three repeats.

**Table S2.** The content of observed phenolic acids in control sample of white cabbage extract.

| Compound | <i>t</i> -cinnamic         | <i>p</i> -coumaric        | caffeic                      | ferulic                    | chlorogenic                  | benzoic                    | Salicylic<br>[ $\text{mg}\cdot\text{g}^{-1}$ DW] | 4-hydroxy<br>benzoic        |
|----------|----------------------------|---------------------------|------------------------------|----------------------------|------------------------------|----------------------------|--------------------------------------------------|-----------------------------|
|          | 2688.357 $\pm$<br>1033.640 | 4724.572 $\pm$<br>456.100 | 83056.360 $\pm$<br>28086.008 | 16060.891 $\pm$<br>602.635 | 561915.499 $\pm$<br>40482.49 | 5599.755 $\pm$<br>482.7370 | 110.089 $\pm$<br>12.784                          | 19075.611 $\pm$<br>2282.984 |

Data are mean  $\pm$  SE of three repeats.

**Table S3.** The content of observed flavonoids in control sample of white cabbage extract.

| Compound | quercetin          | luteolin             | kaempferol            |
|----------|--------------------|----------------------|-----------------------|
|          | 87.870 $\pm$ 5.435 | 316.561 $\pm$ 50.058 | 441.624 $\pm$ 116.531 |

Data are mean  $\pm$  SE of three repeats.
